# Supplementary material
Source: PubMed Central journal article supplement (PMC6728577)
Supplement: DS_10.1177_0022034514556707.pdf [file DS_10.1177_0022034514556707.pdf]

# Excess NF- $\kappa$ B Induces Ectopic Odontogenesis in Embryonic Incisor Epithelium

Journal of Dental Research  
DSI-DS3  
© International & American Associations  
for Dental Research 2014  
Reprints and permissions:  
sagepub.com/journalsPermissions.nav  
DOI: 10.1177/0022034514556707  
jdr.sagepub.com

J. Blackburn<sup>1\*</sup>, K. Kawasaki<sup>1,2\*</sup>, T. Porntaveetus<sup>1,3\*</sup>, M. Kawasaki<sup>1,4</sup>,  
Y. Otsuka-Tanaka<sup>1,5</sup>, Y. Miake<sup>6</sup>, M.S. Ota<sup>7</sup>, M. Watanabe<sup>8</sup>, M. Hishinuma<sup>5</sup>,  
T. Nomoto<sup>5</sup>, S. Oommen<sup>1</sup>, S. Ghafoor<sup>1</sup>, F. Harada<sup>1</sup>, K. Nozawa-Inoue<sup>1</sup>,  
T. Maeda<sup>8</sup>, R. Peterková<sup>9</sup>, H. Lesot<sup>10</sup>, J. Inoue<sup>11</sup>, T. Akiyama<sup>11</sup>,  
R. Schmidt-Ullrich<sup>12</sup>, B. Liu<sup>13</sup>, Y. Hu<sup>14</sup>, A. Page<sup>15</sup>, Á. Ramírez<sup>15</sup>, P.T. Sharpe<sup>1</sup>,  
and A. Ohazama<sup>1,8</sup>

## Appendix

<sup>1</sup>Craniofacial Development and Stem Cell Biology and Biomedical Research Centre, Kings College London, London, UK

<sup>2</sup>Department of Pediatric Dentistry, Niigata University Graduate School of Medical and Dental Sciences, Niigata, Japan

<sup>3</sup>Department of Physiology, Faculty of Dentistry, Chulalongkorn University, Bangkok, Thailand

<sup>4</sup>Division of Bio-Prosthodontics, Department of Oral Health Science, Course for Oral Life Science, Niigata University Graduate School of Medical and Dental Sciences, Niigata, Japan

<sup>5</sup>Department of Special Needs Dentistry, Nihon University School of Dentistry at Matsudo, Matsudo, Japan

<sup>6</sup>Department of Ultrastructural Science, Tokyo Dental College, Chiyoda-ku, Tokyo, Japan

<sup>7</sup>Laboratory of Food Biological Science, Department of Food and Nutrition, Japan Women's University, Bunkyo, Japan

<sup>8</sup>Division of Oral Anatomy, Department of Oral Biological Science, Niigata University Graduate School of Medical and Dental Sciences, Niigata, Japan

<sup>9</sup>Department of Teratology, Institute of Experimental Medicine, Academy of Sciences CR, Prague, Czech Republic

<sup>10</sup>INSERM UMR\_S1109, Team "Osteoarticular and Dental Regenerative NanoMedicine," FMTS, Faculté de Médecine, Faculté de Chirurgie Dentaire, Université de Strasbourg, Strasbourg, France

<sup>11</sup>Division of Cellular and Molecular Biology, Institute of Medical Science, University of Tokyo, Minato-ku, Tokyo, Japan

<sup>12</sup>Department of Signal Transduction in Tumor Cells, Max-Delbrück-Center for Molecular Medicine, Berlin, Germany

<sup>13</sup>Department of Molecular Carcinogenesis, University of Texas MD Anderson Cancer Center, Smithville, TX, USA

<sup>14</sup>Laboratory of Experimental Immunology, Inflammation and Tumorigenesis Section, National Cancer Institute-Frederick, Frederick, MD, USA

<sup>15</sup>Department of Epithelial Biomedicine, Centro de Investigaciones Energéticas, Medioambientales y Tecnológicas (CIEMAT), Madrid, Spain

\*Authors contributing equally to this article.

### Corresponding Authors:

P.T. Sharpe, Department of Craniofacial Development & Stem Cell Biology, King's College London, Dental Institute, London Bridge, London SE1 9RT, UK.

Email: paul.sharpe@kcl.ac.uk

A. Ohazama, Division of Oral Anatomy, Department of Oral Biological Science, Niigata University, Graduate School of Medical and Dental Sciences, 2-5274, Gakkocho-dori, Chuo-ku, Niigata 951-8514, Japan.

Email: atsushiohazama@dent.niigata-u.ac.jp

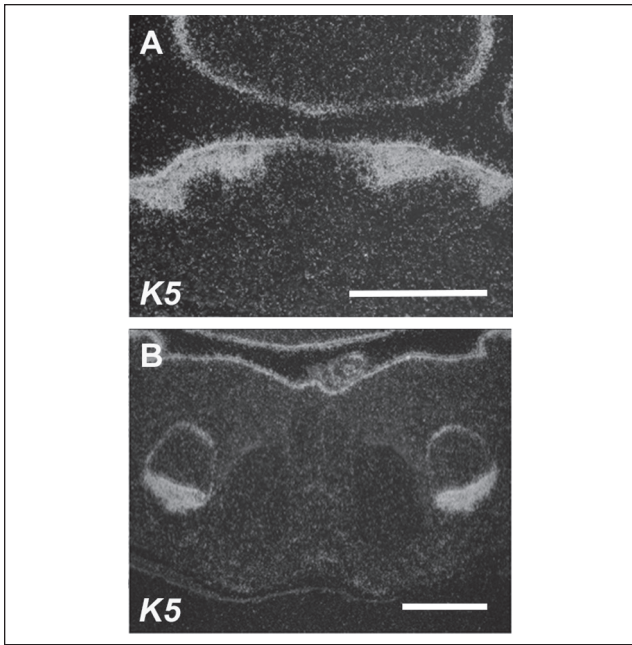

**Appendix Figure 1.** K5 expression in incisor development. K5 expression by radioactive in situ hybridization on frontal head sections at E12.5 (A) and E17.5 (B). Scale bars: 250  $\mu$ m (A), 500  $\mu$ m (B).

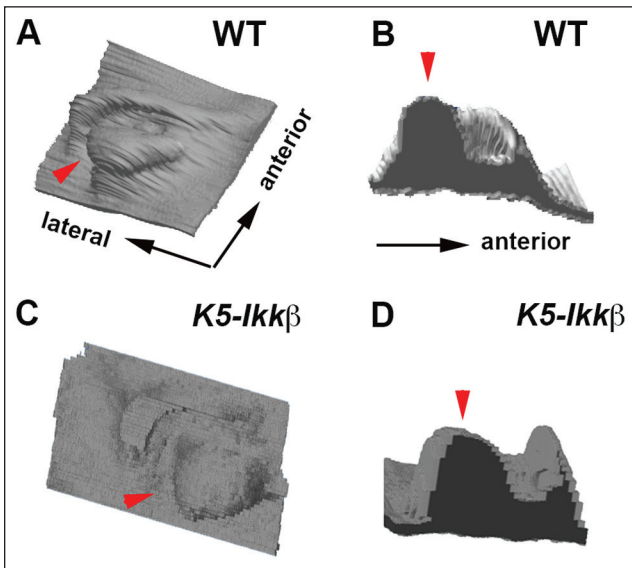

**Appendix Figure 2.** Lower incisor epithelium at E13.5. Three-dimensional (3D) reconstructions of the epithelium in the incisor region at E13.5. The epithelium is viewed from mesenchymal aspect (aboral view; A, C). Sagittal sections through the 3D model (B, D). Wild-type (A, B) and *K5-Ikk $\beta$*  (C, D) embryos. Formation of a supernumerary incisor in *K5-Ikk $\beta$*  embryos is not visible yet. Arrowheads indicate the epithelial bud of endogenous incisors.

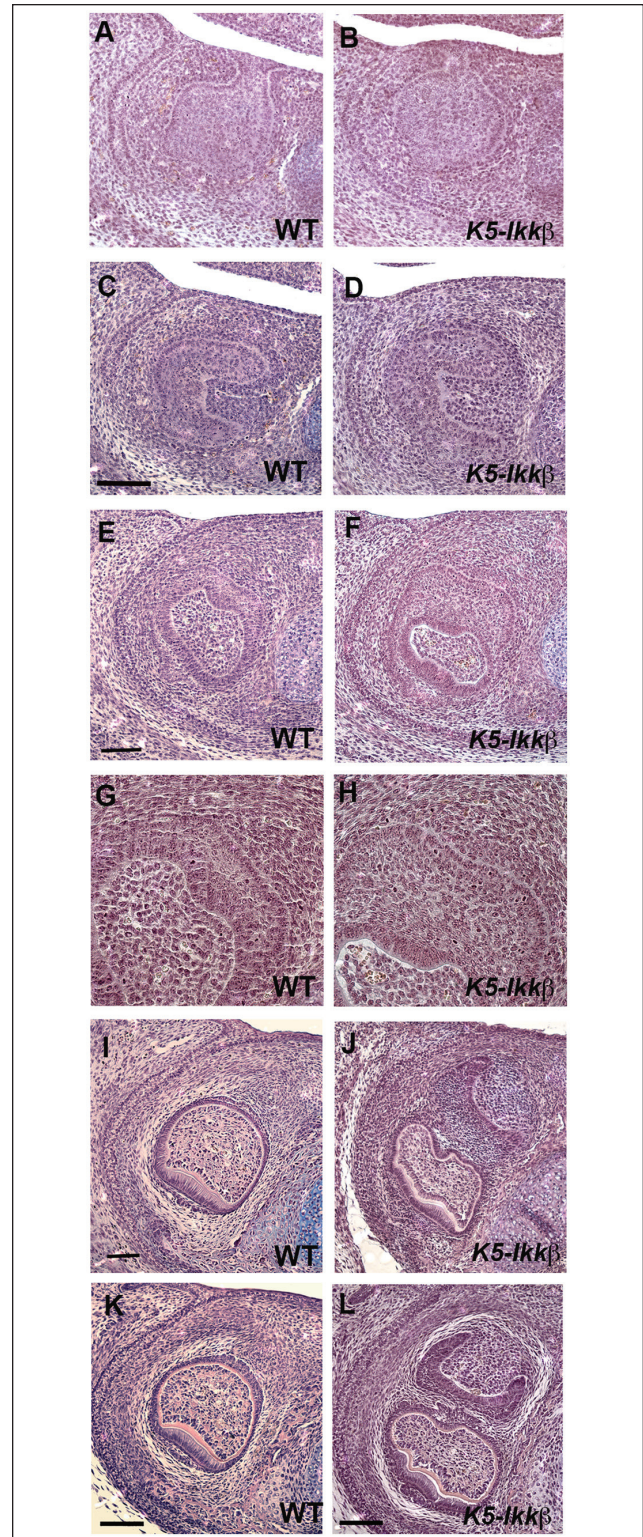

**Appendix Figure 3.** Supernumerary incisor development on frontal histological sections. Frontal sections showing lower incisors in wild-type (A, C, E, G, I, K) and *K5-Ikk $\beta$*  (B, D, F, H, J, L) at E14.5 (A-D), E15.5 (E-H), E16.5 (I, J), and E17.5 (K, L). (A, B) Anterior region of incisors where dental epithelium is connected to the oral epithelium. (C, D) Posterior region of incisors where there is no epithelial connection between dental and oral epithelium. (G, H) High magnification of the lingual region of the incisor tooth germ from E and F, respectively. Scale bar, 100  $\mu$ m.



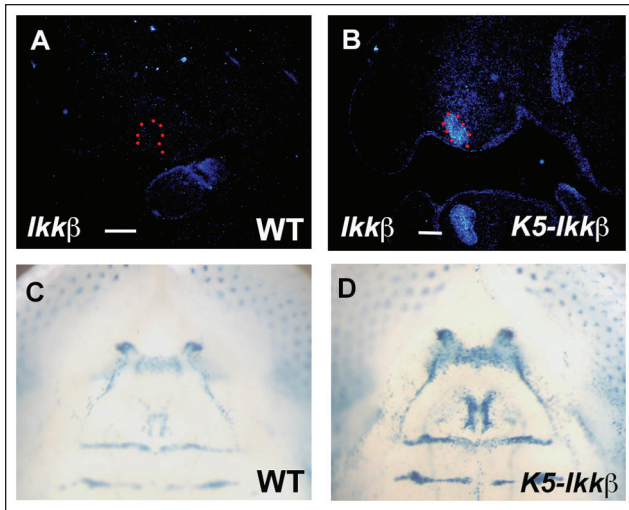

**Appendix Figure 4.** Molecular changes in the upper incisors of *K5-Ikkβ* mice. *Ikkβ* expression by radioactive in situ hybridization (**A, B**) on sagittal sections of wild-type (**A**) and *K5-Ikkβ* mice (**B**) at E13.5. (**C, D**) LacZ staining in  $(Igx)_{3x}$ -*conalacZ* (**C**) and  $(Igx)_{3x}$ -*conalacZ*;*K5-Ikkβ* (**D**) mice at E14.5. Scale bars: 200 μm (**A, B**). Tooth epithelium is outlined by red dots.

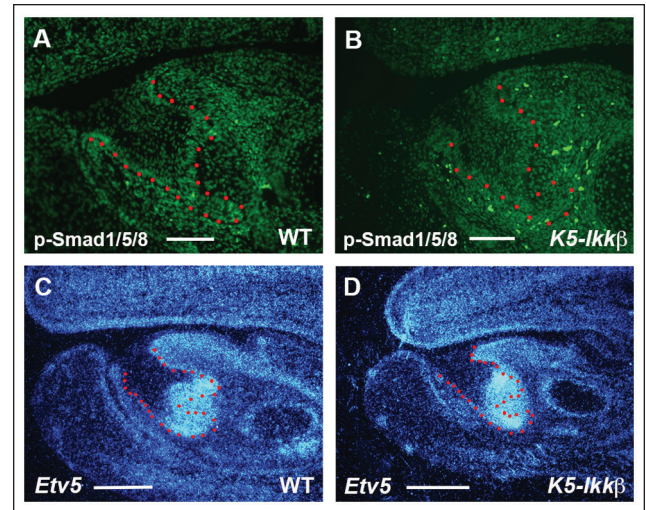

**Appendix Figure 5.** Molecular changes in the lower incisor of *K5-Ikkβ* mice. Immunolocalization of phosphorylated Smad1/5/8 (**A, B**) and *Etv5* mRNA expression (**C, D**) on sagittal head sections at E14.5. Tooth epithelium is outlined by red dots. Scale bars: 200 μm (**A, B**), 400 μm (**C, D**).

**Appendix Table.** Frequency Distribution of the Extra Incisors in *Ikkβ*-K5 Mice.

|                | E16.5 | Adult (>6 wk) |
|----------------|-------|---------------|
| Number of mice | 43/43 | 63/63         |
